# Supplementary material for: Functional characterization of the 12p12.1 renal cancer-susceptibility locus implicates BHLHE41
Source: PubMed Central journal article supplement (PMC4941055; doi:10.1038/ncomms12098), 2016-07-07
Supplement: ncomms12098-s1.pdf [file ncomms12098-s1.pdf]

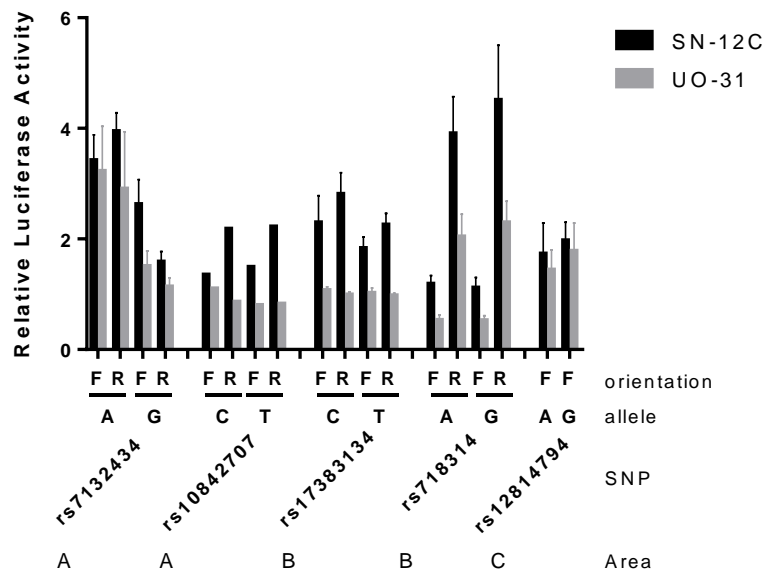

**Supplementary Figure 1.** Enhancer luciferase assay for 5 SNPs associated with RCC and localized in potential regulatory regions according to the ENCODE data tested in SN12C (dark grey) and UO31(light grey) renal cancer cell lines. DNA fragments containing the indicated allele of each of 5 SNPs were cloned in a forward (F) or reverse (R) orientation upstream of a minimal promoter that drives luciferase expression. A-C refers to the areas in Figure 1. The average relative luciferase activity of 3 independent experiments, performed in triplicate, is plotted; error bars represent the standard deviation.

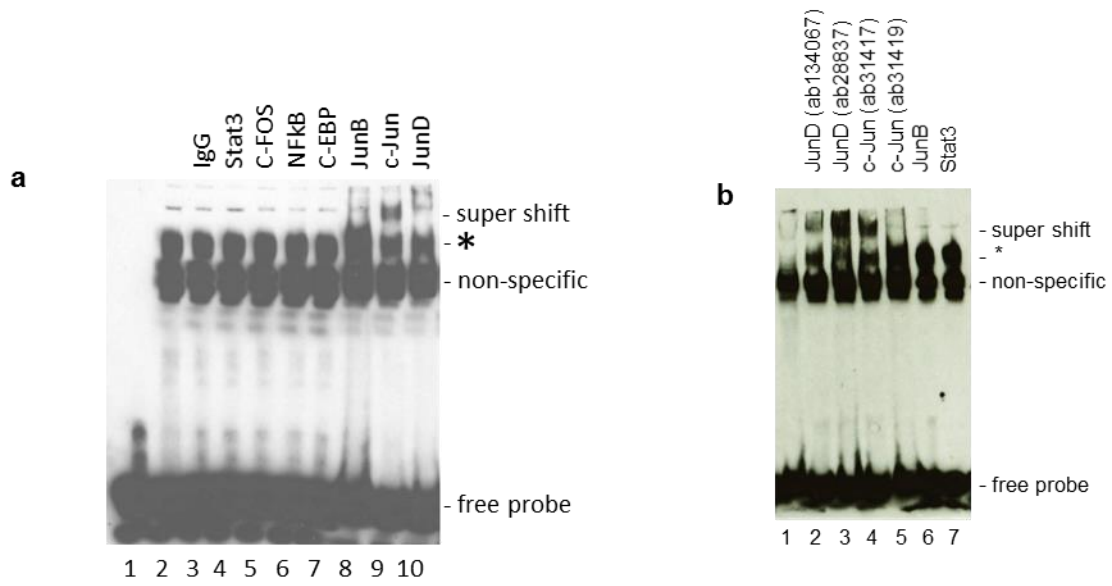

**Supplementary Figure 2.** EMSA of probe containing the risk allele (A) of rs7132434 with nuclear extract from UO-31 cells. **(a)** Supershift with indicated antibody. Lane 1 contains no extract. Lane 2 contains extract, but no antibody. **(b)** Supershift EMSA with indicated antibodies. Lane 1 contains extract, but no antibody. Each antibody was tested in super shift assays at least 3 times.

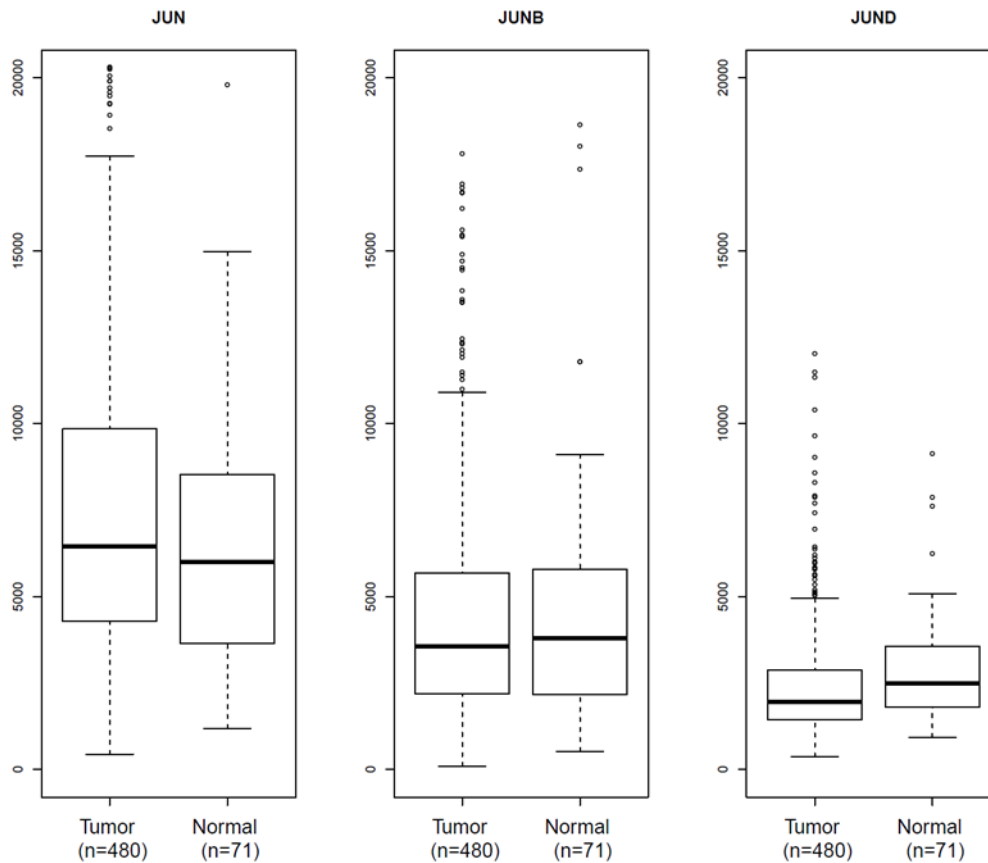

**Supplementary Figure 3.** Expression of (a) *JUN*, *JUNB*, and *JUND* in 71 normal renal and 481 tumor renal tissues from the TCGA database. The expression is shown as normalized read counts. Thick black lines in the center of boxes represent the median, box boundaries designate the 25<sup>th</sup> and 75<sup>th</sup> percentiles and whiskers extend to the minimum of either the data range or 1.5 times the interquartile range. Statistical outliers are plotted as points extending beyond the whiskers.

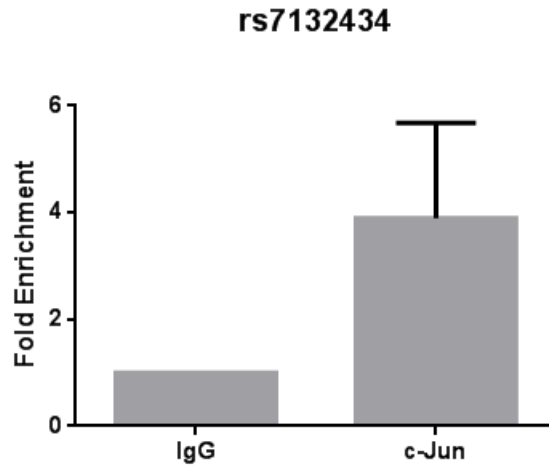

**Supplementary Figure 4.** ChIP with anti c-Jun (AbCam ab31419). Average fold enrichment relative to IgG for 5 independent experiments is plotted. qPCR assays were conducted in triplicate. Error bar represents the standard deviation.  $P = 0.02$ , Student's t-test, with two-tailed distribution.

## Clear cell RCC

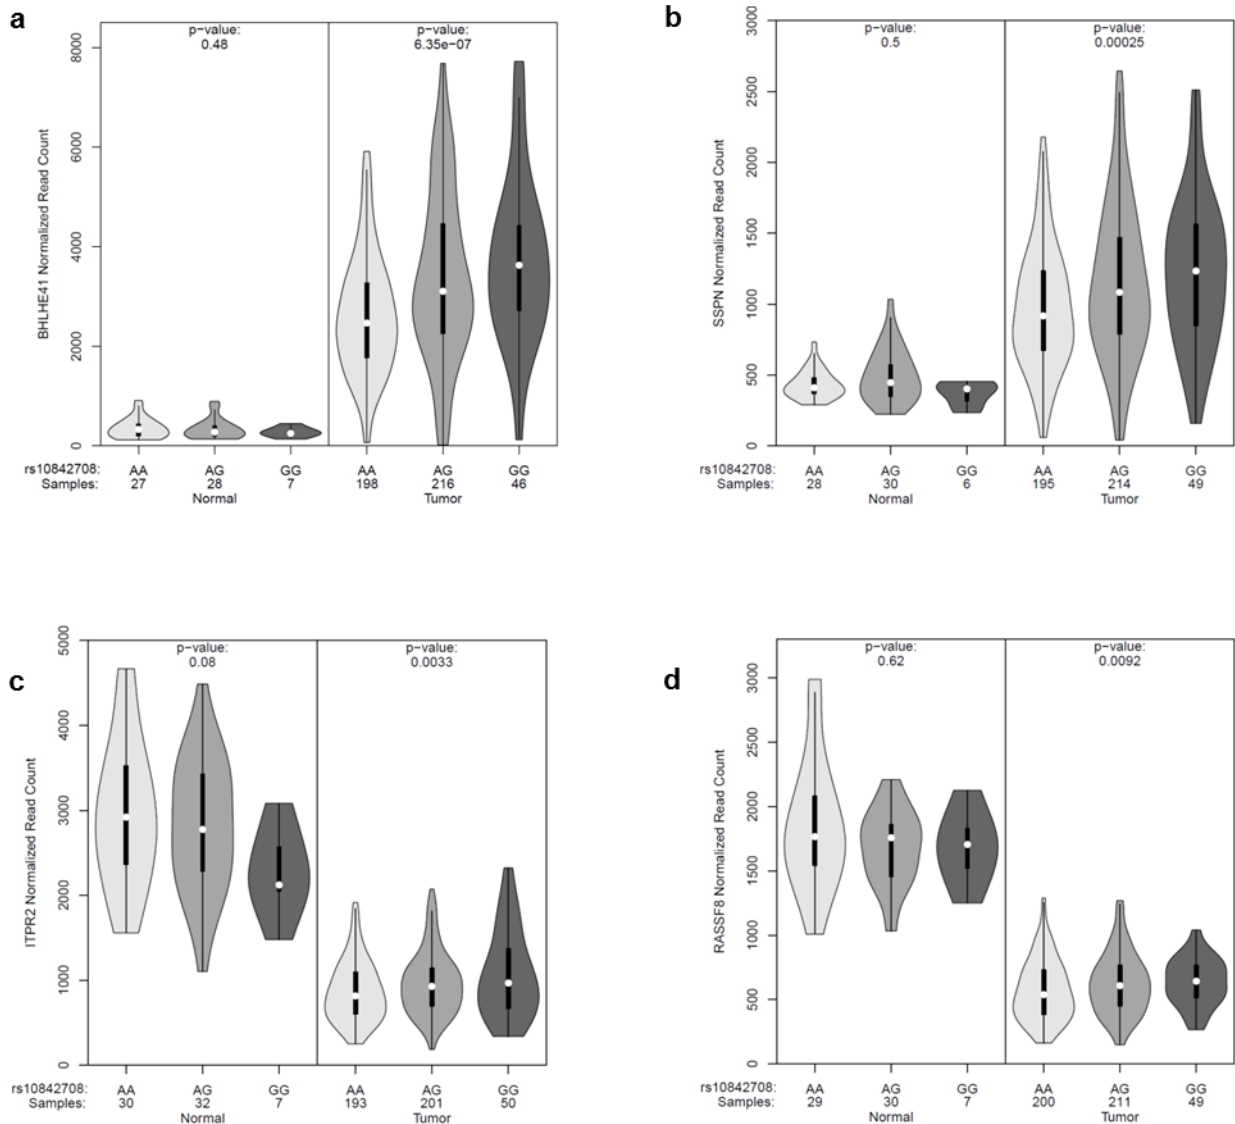

**Supplementary Figure 5.** eQTL analysis of RCC susceptibility variants on 12p12.1 in Clear Cell RCC. For the violin plots, the white dot represents the median, thick black line is the interquartile range (25<sup>th</sup> to 75<sup>th</sup> percentiles) and the whiskers represent the data range. P-values from a linear trend test. **(a)** The RCC risk allele rs10842708 (G) is associated with over expression of *BHLHE41* in clear cell renal carcinoma tissue ( $P = 6.35 \times 10^{-7}$ ). The expression is shown as normalized read counts from 71 normal and 481 tumor renal tissues. Expression of **(b)** *SSPN*, **(c)** *ITPR2*, and **(d)** *RASSF8* for three genotypes of rs10842708.

## Papillary RCC

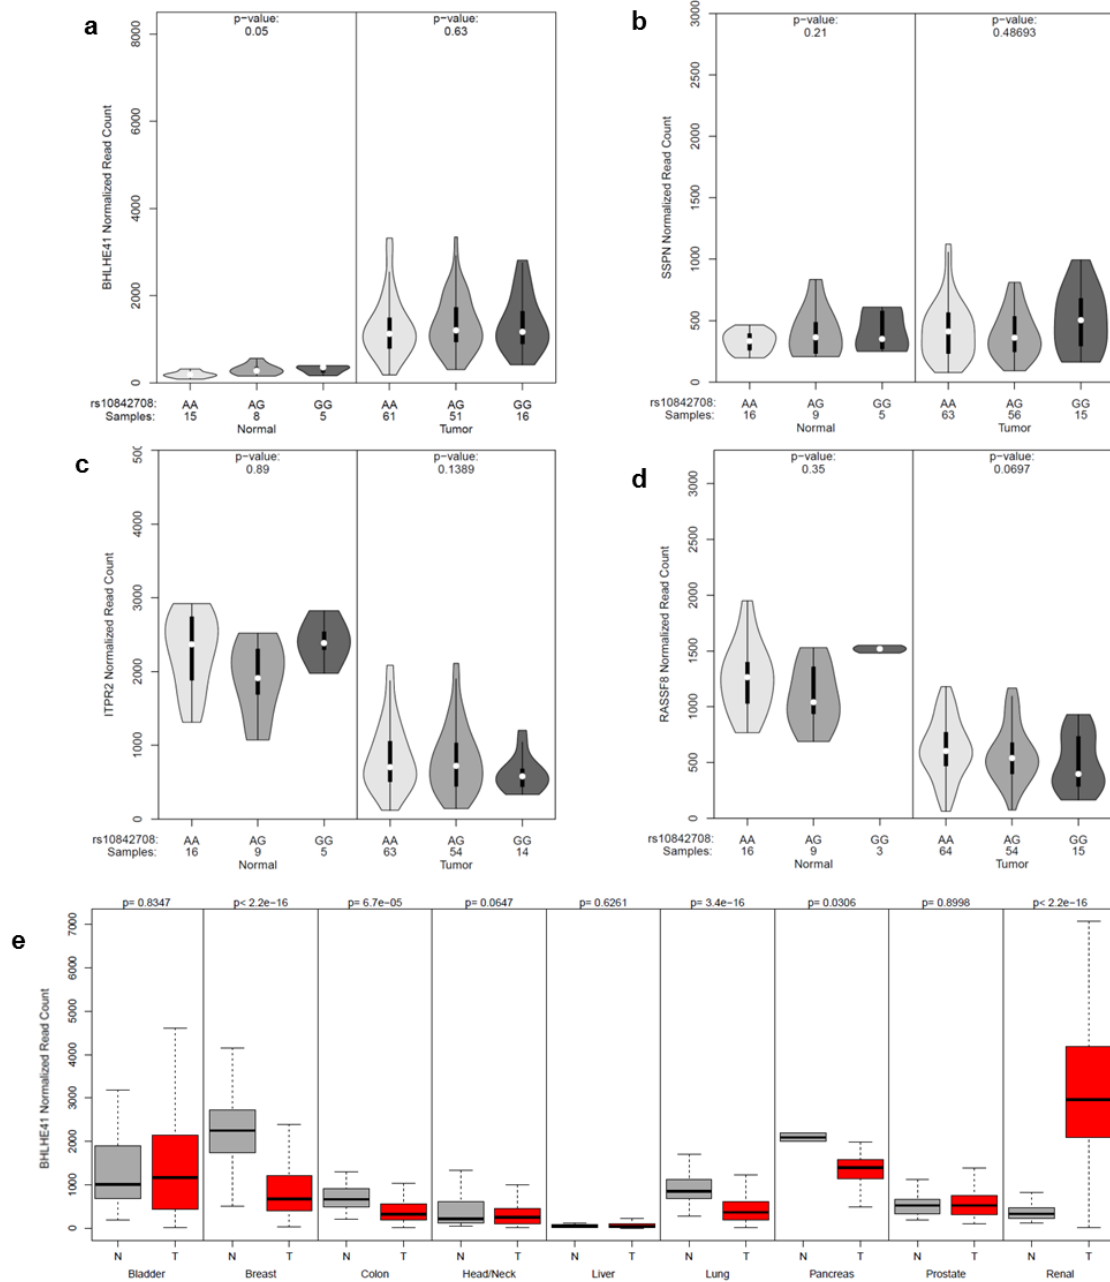

**Supplementary Figure 6.** eQTL analysis of RCC susceptibility variants in Papillary Renal Carcinoma.

The RCC risk allele rs10842708 (G) is not associated with expression of (a) *BHLHE41*, (b) *SSPN*, (c) *ITPR2*, or (d) *RASSF8*. The expression is shown as normalized read counts from 30 normal and 141 tumor renal tissues. (e) Expression of *BHLHE41* in several tissues from TCGA. N, normal, grey; T tumor, red. In the violin plots (a-d), the white point represents the median, thick black line is the interquartile range (25<sup>th</sup> to 75<sup>th</sup> percentiles) and the whiskers represent the data range. In the boxplots (e), thick black lines in the center of boxes represent the median, box boundaries designate the 25<sup>th</sup> and 75<sup>th</sup> percentiles and whiskers extend to the data range. P-values are from linear trend tests.

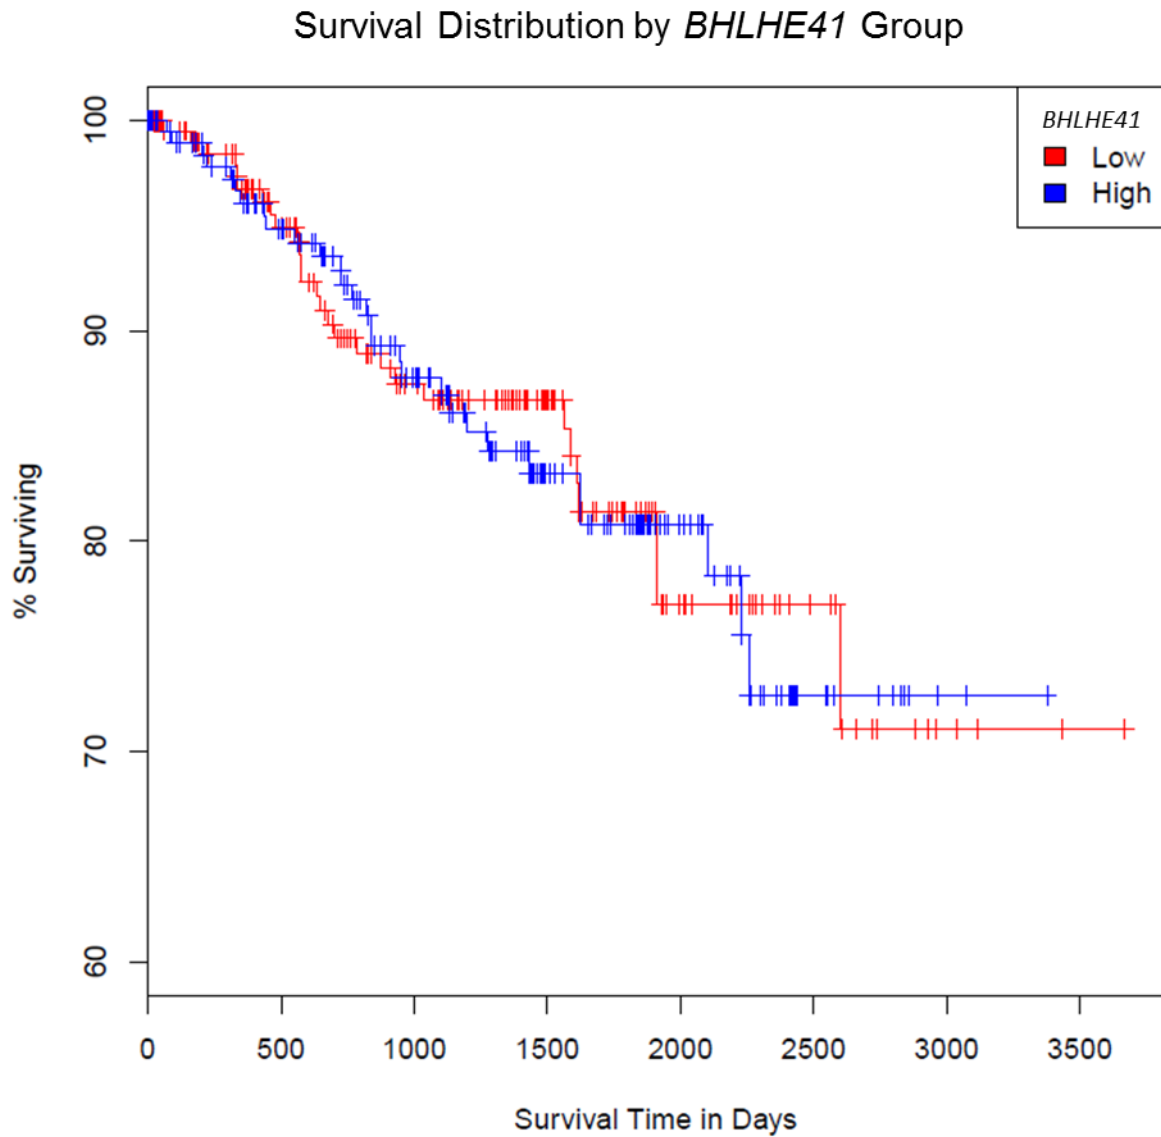

**Supplementary Figure 7.** Kaplan-Meier estimates of survival according to *BHLHE41* gene expression group (log-rank test = 0.924, see Methods for further details). Red, tumors expressing 'low' levels of *BHLHE41*; blue, tumors with 'high' expression levels.

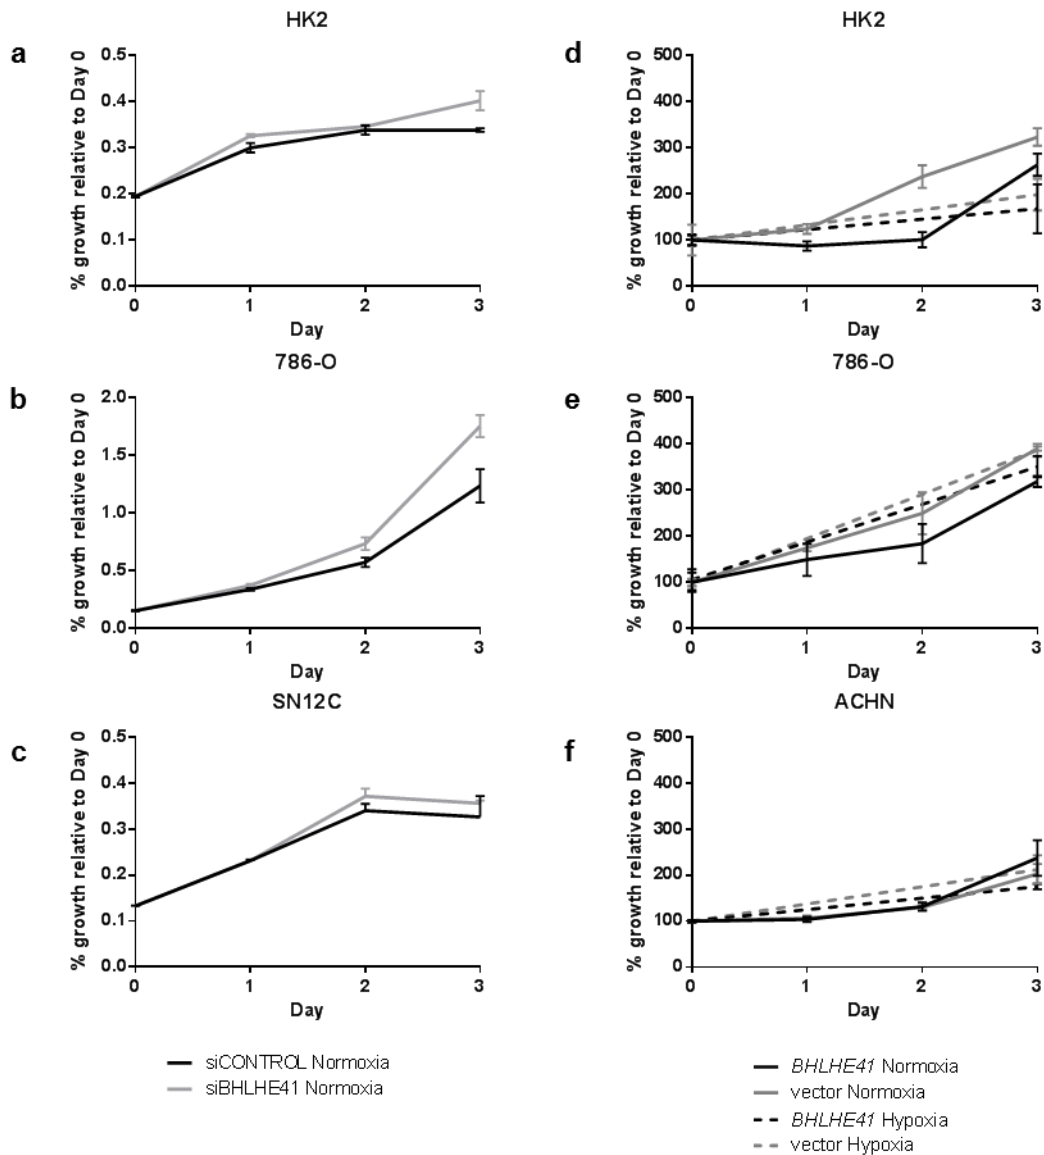

**Supplementary Figure 8.** Growth curves for (a) HK2, (b) 786-0, and (c) SN12C cell lines transiently transfected with siRNA. Cell proliferation for siRNA cells was measured using WST. N=3, error bars represent the standard deviation around the mean. Growth curves for (d) HK2, (e) 786-0, and (f) ACHN cell lines stably overexpressing *BHLHE41*, under normoxia and hypoxia. Cell proliferation assays for cells stably overexpression *BHLHE41* were measured using FluoReporter Blue Fluorometric dsDNA quantification kit (Thermo). N=3, independent experiments were performed in triplicate, error bars represent the standard deviation around the mean.



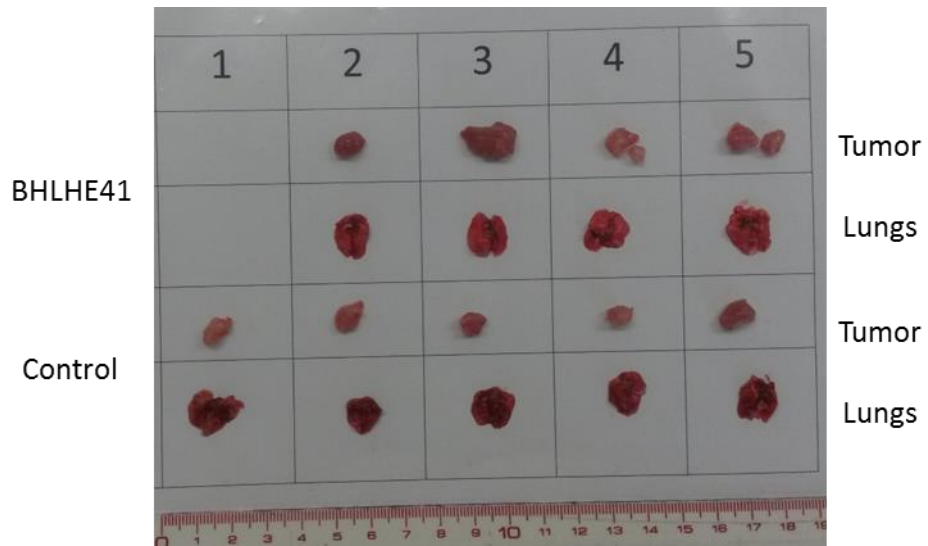

**Supplementary Figure 9.** Representative images of lungs and tumors harvested 6 weeks after xenograft with ACHN-*BHLHE41* or ACHN-vector cells. Ruler in cm is shown for scale.

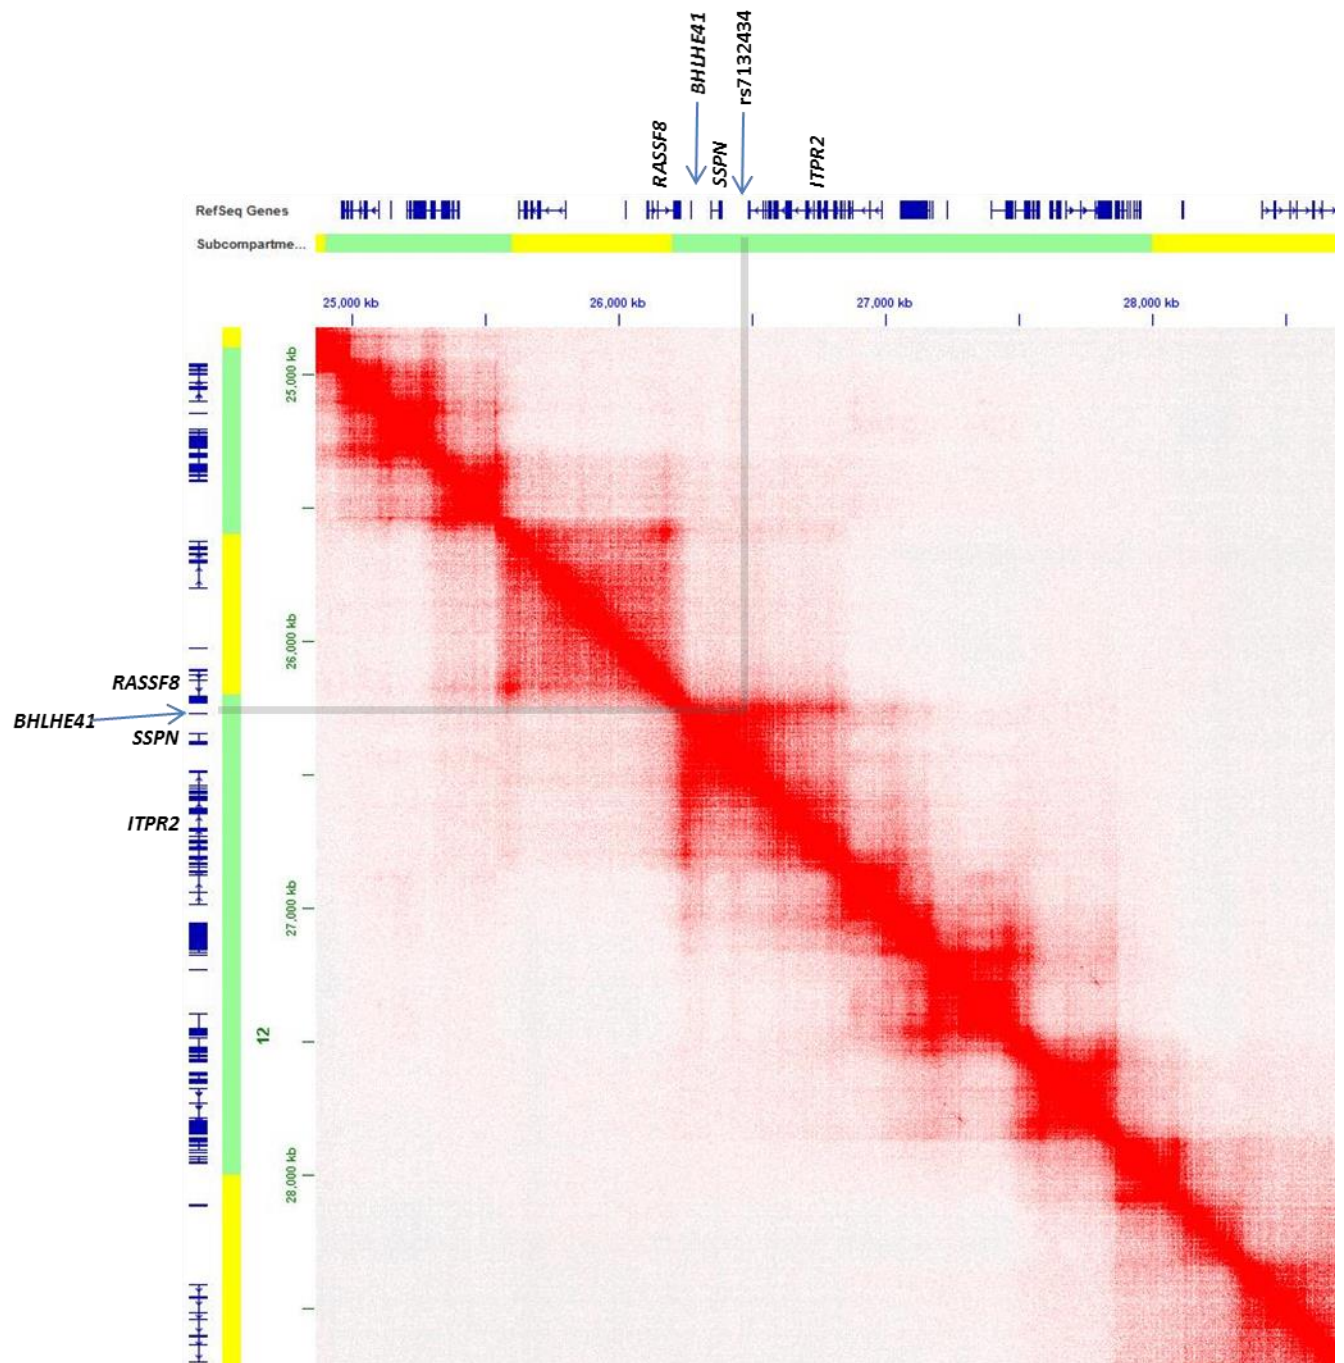

**Supplementary Figure 10.** Hi-C results from Rao and Huntley<sup>1</sup> for the 12p12.1 RCC risk region. Data can be found in GEO under the accession code GSE63525.

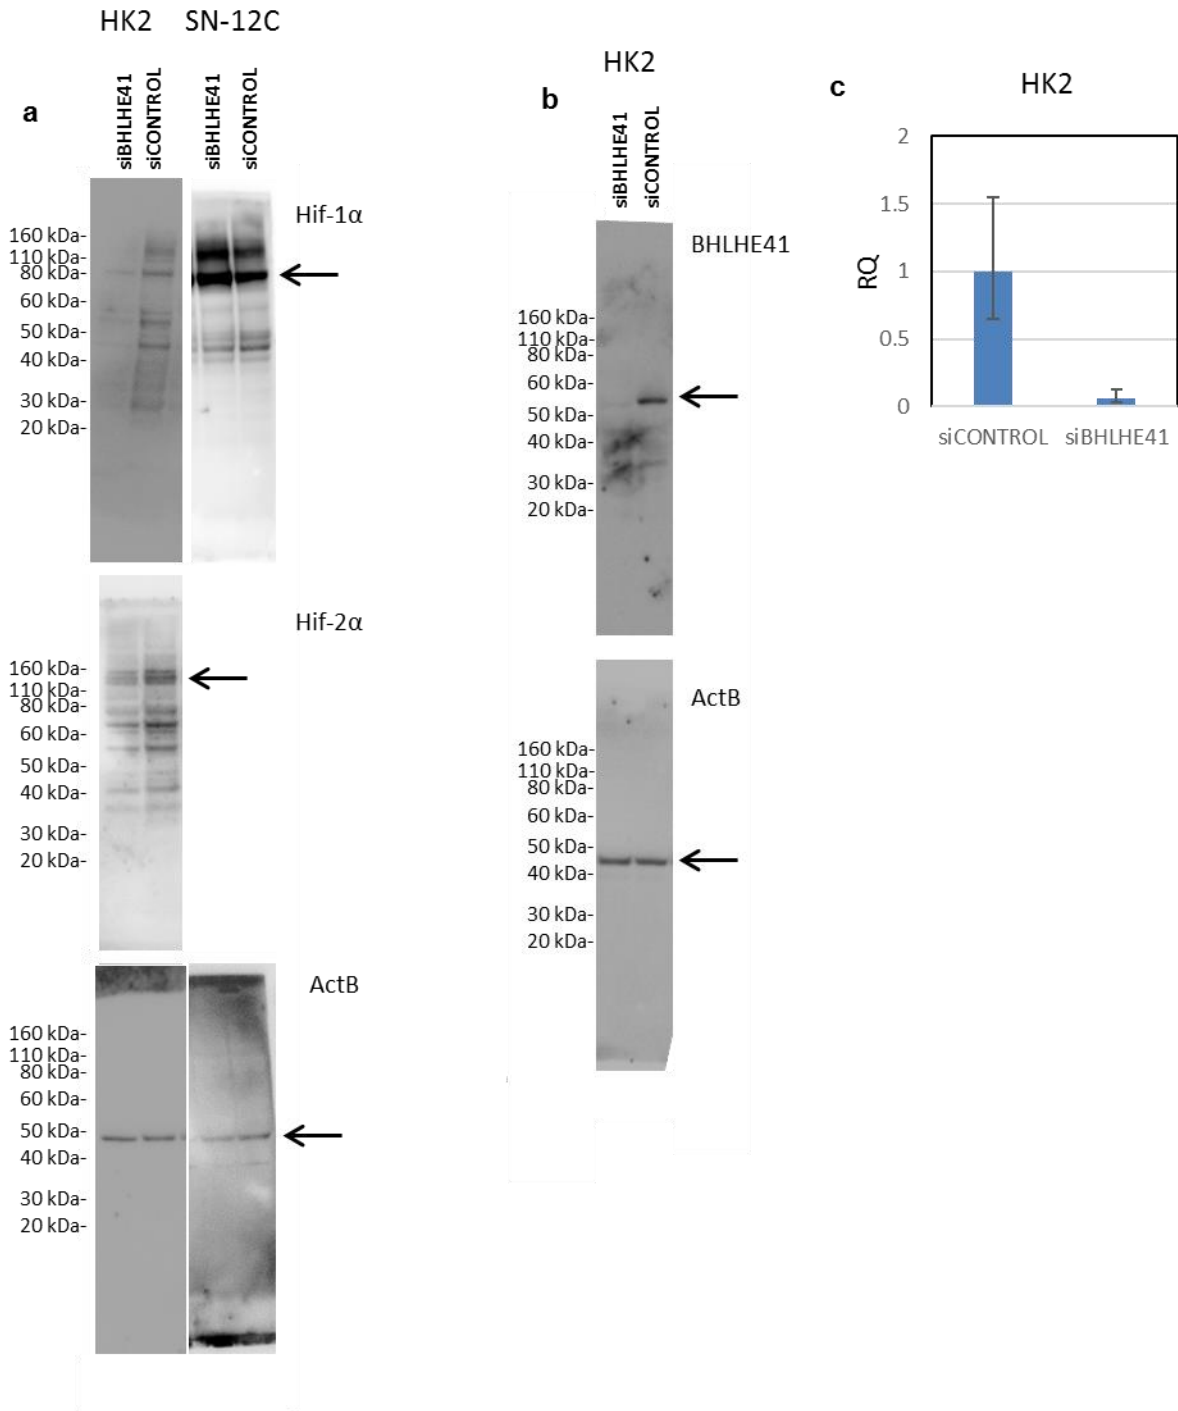

**Supplementary Figure 11.** Western blots. (a) Western blots of whole cell extracts of HK2 and SN-12C human renal cells transfected with siRNA and grown under hypoxic (1% O<sub>2</sub>) conditions. Blots were probed with antibodies as indicated in the figure. (b) HK2 cells transfected with siRNA, and treated with 100  $\mu$ M cobalt chloride for 24 hrs to mimic hypoxic conditions. Blots were probed first with antibody to BHLHE41, then stripped and re-probed for ActB. (c) qPCR for *BHLHE41* expression in HK2 cells 48 hrs after transfection with siRNA.

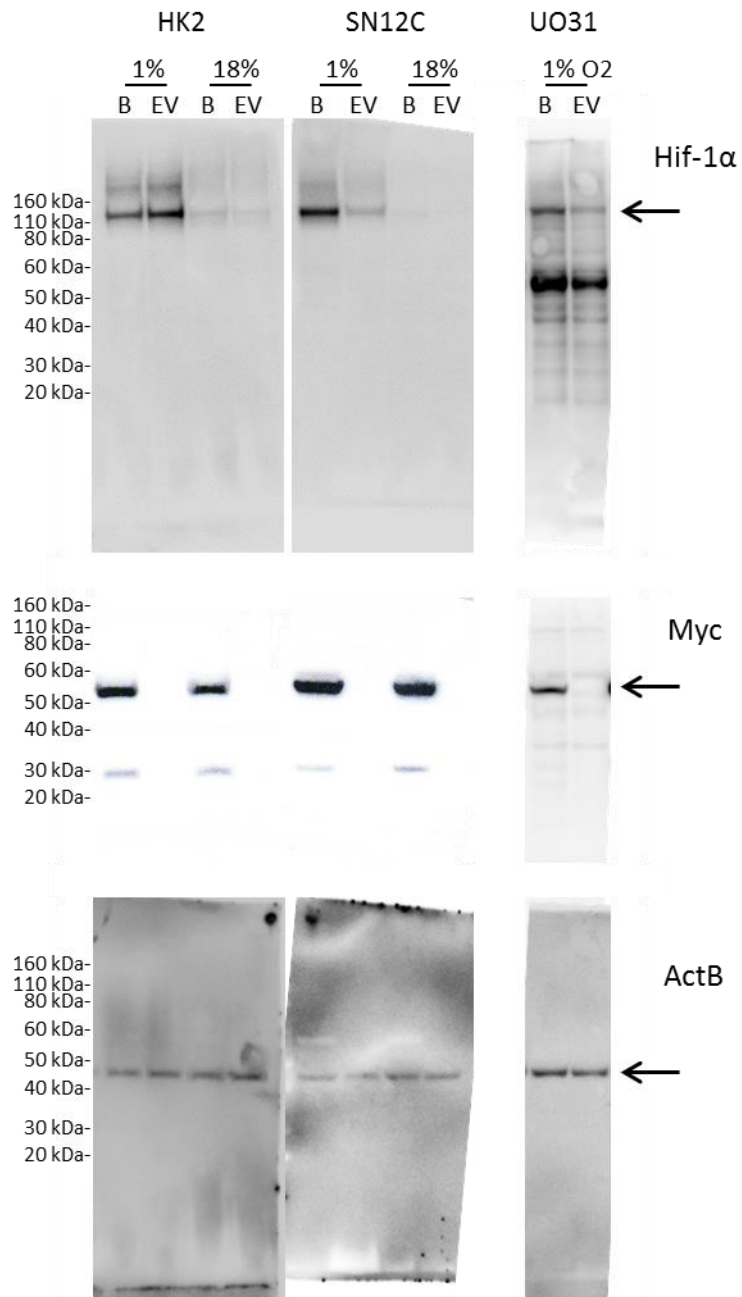

**Supplementary Figure 12.** Western blots of whole cell extracts of HK2, SN-12C, and UO31 cells 48 hrs after being transiently transfected with pcDNA3.1-*BHLHE41*-myc (B) or pcDNA3.1 vector (EV) under hypoxic (1% O<sub>2</sub>) or normoxic (18% O<sub>2</sub>) conditions.

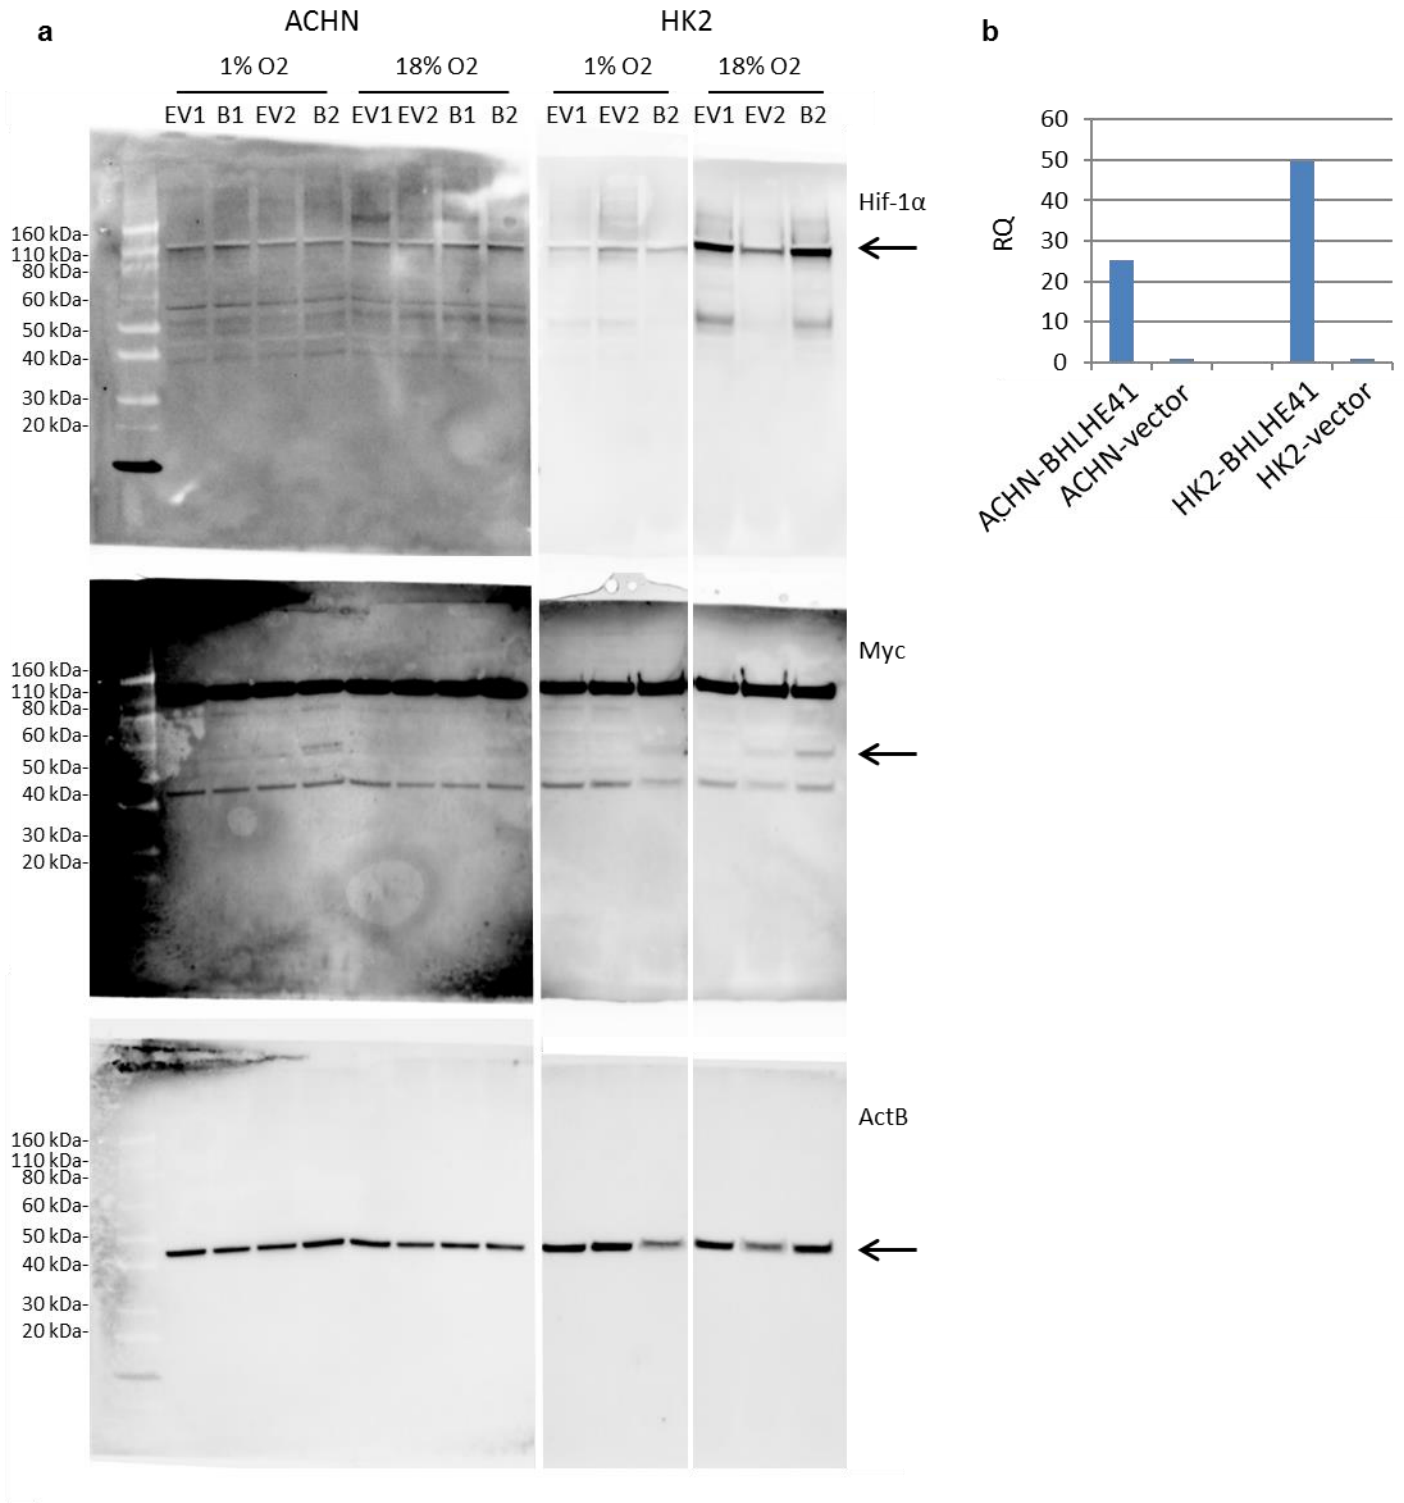

**Supplementary Figure 13.** Stable overexpression of BHLHE41 in renal cancer cell lines. **(a)** Western blots of whole cell extracts of HK2 and ACHN stably transfected with pCMV-*BHLHE41*-myc (B) or pCMV vector (EV) under hypoxic or normoxic conditions. Two isolates were selected for B and EV each. All western blots were repeated at least 3 times. **(b)** qPCR to measure *BHLHE41* expression, in HK2 and ACHN stably overexpressing *BHLHE41*.

**Supplementary Table 1.** SNPs demonstrating nominally significant associations with RCC risk ( $p < 5 \times 10^{-4}$ ).

| SNP        | $r^2$ with<br>rs718314 | Genotyped            | P-value  |
|------------|------------------------|----------------------|----------|
| rs4963975  | 0.956                  | Yes <sup>b,c</sup>   | 2.13E-06 |
| rs12814794 | 0.956                  | No                   | 2.31E-06 |
| rs718314   | -                      | Yes <sup>a,b,c</sup> | 3.44E-06 |
| rs10842707 | 0.913                  | No                   | 3.49E-06 |
| rs10842705 | 0.913                  | No                   | 3.92E-06 |
| rs2129869  | 0.869                  | No                   | 4.08E-06 |
| rs7302344  | 0.64                   | No                   | 4.24E-06 |
| rs1049376  | 0.64                   | Yes <sup>b,c</sup>   | 5.00E-06 |
| rs1027087  | 1                      | No                   | 5.11E-06 |
| rs1398676  | 1                      | No                   | 5.22E-06 |
| rs1049380  | 0.64                   | Yes <sup>a,c</sup>   | 5.27E-06 |
| rs11048458 | 0.704                  | No                   | 5.31E-06 |
| rs4963979  | 0.956                  | No                   | 5.49E-06 |
| rs2137564  | 0.956                  | No                   | 5.58E-06 |
| rs1463679  | 1                      | No                   | 5.59E-06 |
| rs2175723  | 0.956                  | No                   | 5.60E-06 |
| rs10842704 | 0.956                  | No                   | 5.63E-06 |
| rs1872992  | 1                      | No                   | 5.68E-06 |
| rs10842703 | 1                      | No                   | 5.68E-06 |
| rs11048470 | 0.685                  | No                   | 6.00E-06 |
| rs10743579 | 0.956                  | No                   | 6.04E-06 |
| rs11048454 | 0.956                  | No                   | 6.04E-06 |
| rs10842708 | 1                      | No                   | 6.30E-06 |
| rs7132434  | 1                      | No                   | 6.36E-06 |
| rs11048456 | 0.957                  | No                   | 6.43E-06 |
| rs11534749 | 0.98                   | No                   | 6.84E-06 |
| rs4963661  | 0.99                   | No                   | 8.09E-06 |
| rs11048457 | 1                      | No                   | 8.29E-06 |
| rs12227542 | 0.98                   | No                   | 9.07E-06 |
| rs10842714 | 0.65                   | No                   | 1.24E-05 |
| rs11048447 | 0.719                  | Yes <sup>c</sup>     | 2.41E-05 |
| rs10771276 | 0.47                   | No                   | 2.72E-05 |
| rs9442     | 0.507                  | Yes <sup>a,b,c</sup> | 2.86E-05 |
| rs4963983  | 0.54                   | No                   | 3.11E-05 |
| rs10842715 | 0.507                  | No                   | 3.69E-05 |
| rs4654     | 0.469                  | No                   | 3.83E-05 |
| rs2570     | 0.46                   | No                   | 3.88E-05 |
| rs10743582 | 0.48                   | No                   | 3.89E-05 |
| rs8311     | 0.441                  | No                   | 3.93E-05 |
| rs12829457 | 0.692                  | No                   | 4.08E-05 |
| rs10842702 | 0.402                  | No                   | 4.83E-05 |
| rs10842713 | 0.462                  | No                   | 5.00E-05 |
| rs7976877  | 0.507                  | No                   | 5.47E-05 |
| rs2048618  | 0.333                  | No                   | 8.59E-05 |

(a) Directly genotyped in the International Agency for Research on Cancer (IARC) European ancestry samples (cases=1,936, controls=3,742)

(b) Directly genotyped in the Wellcome Trust Case Control Consortium (WTCCC) European ancestry samples (cases=350, controls=1,361)

(c) Directly genotyped in U.S. National Cancer Institute (NCI) European ancestry samples (cases=1,311, controls=3,424)

**Supplementary Table 2** Genes showing differential expression in ACHN cells

| gene     | log2(fold_change) | gene      | log2(fold_change) | gene     | log2(fold_change) | gene     | log2(fold_change) |
|----------|-------------------|-----------|-------------------|----------|-------------------|----------|-------------------|
| CFHR2    | inf               | MAL2      | -1.01829          | PLIN2    | -1.58253          | CCL2     | -2.4894           |
| IRX6     | inf               | AMPD2     | -1.03582          | ANGPTL4  | -1.58647          | TCN2     | -2.56915          |
| IL11     | 4.7806            | ELMSAN1   | -1.05134          | KCNQ1OT1 | -1.5996           | JMY      | -2.57345          |
| PLXNA2   | 4.21744           | HKDC1     | -1.05686          | CEBPD    | -1.63008          | SMPDL3A  | -2.60172          |
| CPA4     | 4.15533           | KANK2     | -1.05893          | OAF      | -1.64197          | CHSY3    | -2.62552          |
| FRMPD3   | 3.89708           | VLDLR     | -1.07566          | CRISPLD2 | -1.64384          | PAQR5    | -2.73719          |
| KRT81    | 3.73926           | PFKFB3    | -1.10827          | ADRB2    | -1.66479          | KCNQ3    | -2.74741          |
| EFEMP1   | 3.68384           | COL6A1    | -1.13268          | ELF3     | -1.68766          | SORBS2   | -2.76874          |
| HNRNPLL  | 3.50043           | DDIT4     | -1.13448          | SDPR     | -1.7006           | NPNT     | -2.78843          |
| GDNF     | 3.46511           | VGFB      | -1.14778          | C3       | -1.72958          | CD177    | -2.81548          |
| GFOD1    | 3.08665           | ACSL1     | -1.1627           | ANK3     | -1.73292          | PSG3     | -2.86082          |
| PAK3     | 3.0425            | TIMP2     | -1.17702          | NOV      | -1.73568          | ATP9A    | -2.87343          |
| NTN4     | 3.01499           | PAM       | -1.18508          | CABLES1  | -1.75045          | THY1     | -2.92018          |
| IGDCC4   | 2.52002           | SNTB1     | -1.19556          | PPL      | -1.77356          | TLR2     | -2.92044          |
| COL1A1   | 2.5146            | EFHD2     | -1.23215          | KCNAB2   | -1.78131          | CLDN2    | -3.2718           |
| EMB      | 2.49581           | PNRC1     | -1.23238          | DHRS13   | -1.78435          | PTCH1    | -3.29396          |
| GPC4     | 2.42869           | SCD       | -1.23957          | MBP      | -1.81326          | ARHGAP24 | -3.34405          |
| BHLHE41  | 2.38012           | BIRC3     | -1.24171          | CSF2     | -1.86831          | CSDC2    | -3.38446          |
| CHRDL1   | 2.23067           | CXCL8     | -1.2442           | CNTNAP1  | -1.90771          | SMTNL2   | -3.43163          |
| BAAT     | 2.22841           | GGA2      | -1.27479          | NDRG1    | -1.94171          | SLC16A7  | -3.5009           |
| C4orf26  | 2.21353           | SEL1L3    | -1.28648          | HILPDA   | -1.95677          | PTGS1    | -3.64958          |
| KIAA1462 | 2.1595            | PDGFB     | -1.28747          | COL12A1  | -1.99011          | ANKRD34B | -3.68729          |
| WNT5B    | 1.99927           | MYO1D     | -1.32133          | CDKN1C   | -2.04422          | SLC2A2   | -3.8387           |
| ADAMTSL1 | 1.97399           | CXCL1     | -1.32354          | ADAMTS15 | -2.05426          | CHST9    | -3.84866          |
| ACAA2    | 1.90833           | AMACR     | -1.32426          | MXI1     | -2.09038          | VCAM1    | -4.06735          |
| SCARA3   | 1.77145           | FGFR1     | -1.34635          | CA12     | -2.13511          | COLEC10  | -4.1676           |
| ANKRD1   | 1.55499           | LAMB1     | -1.36025          | ADM      | -2.17796          | NCALD    | -4.24346          |
| STOM     | 1.5256            | TSPAN2    | -1.39818          | AGPAT9   | -2.24643          | TM4SF4   | -4.33786          |
| CHMP1B2P | 1.52126           | S1PR1     | -1.42913          | EDN2     | -2.24892          | NPR1     | -4.61466          |
| E2F7     | 1.4298            | ARRDC3    | -1.43523          | SCARF1   | -2.2989           | MAL      | -4.66062          |
| SLC16A12 | 1.3974            | GABARAPL1 | -1.46527          | DEPTOR   | -2.36817          | KCNJ15   | -5.08927          |
| SERPINE1 | 1.39514           | FXYD2     | -1.51144          | GUCY1A2  | -2.372            | FOXQ1    | -5.15047          |
| TMCC3    | 1.314             | IGFBP3    | -1.5631           | LAMA1    | -2.37602          | CFI      | -5.17501          |
| PRPS1    | 1.18601           | FOXN3     | -1.56391          | PIK3IP1  | -2.4208           | PSG8     | -5.27921          |
| GPC1     | 1.12523           | SPNS2     | -1.57525          | SECTM1   | -2.44739          | PRUNE2   | -5.50978          |
|          |                   |           |                   | TNFSF10  | -2.46717          | SRGN     | -6.86143          |

**Supplementary Table 3.** Oligonucleotides used in this study

|                                                   |                                                   |
|---------------------------------------------------|---------------------------------------------------|
| Cloning                                           |                                                   |
| Region 1:<br>cloning -forward<br>cloning -reverse | TCAGCTCAGCAGTTATGTCTTTG<br>TGCATGATTCCCAGGTGTTA   |
| Region 2:<br>cloning -forward<br>cloning -reverse | CAGTTCAGTGTGAGAACTGCAC<br>TCAGCTGATCACACTGTCCAC   |
| Region 3:<br>cloning -forward<br>cloning -forward | TGAGGCAGATGGAGATTTGA<br>GCTGGAATGTGTCCACTCCT      |
| EMSA                                              | (only the forward strand is given)                |
| rs7302344<br>Minor allele<br>Common allele        | ATGTCTTGCTGTGTAATAATAG<br>CTATTTTACATAGCAAGACAT   |
| rs10842702<br>Minor allele<br>Common allele       | ATAATGCCTTCAGGGTGCCCA<br>ATAATGCCTTGAGGGTGCCCA    |
| rs1027087<br>Minor allele<br>Common allele        | TGGCAAAAGAGACAGGAGTCAT<br>TGGCAAAAGAGTCAGGAGTCATT |
| rs2137564<br>Minor allele<br>Common allele        | GGGCCTGGCAAGCAGTCTGAA<br>GGGCCTGGCAGGCAGTCTGAA    |
| rs7132434:<br>Minor allele<br>Common allele       | ACAGTGAATCATCTGTGAGCT<br>ACAGTGAATCGTCTGTGAGCT    |
| rs10842707:<br>Minor allele<br>Common allele      | GTCTTTGAATTTGAGTCTCAG<br>CTGAGACTCAAATTCAAAGAC    |
| rs718314:<br>Minor allele<br>Common allele        | CCATTTGTCAGTCTGTCTGTC<br>CCATTTGTCAATCTGTCTGTC    |
| rs17383134:<br>Minor allele<br>Common allele      | TTGGTAGTAGCTATTTCTGTG<br>TTGGTAGTAGTTATTTCTGTG    |
| rs12814794:<br>Minor allele<br>Common allele      | CTGTAGCGACGTGCAAGGGGT<br>CTGTAGCGACATGCAAGGGGT    |
| NFkB consensus oligonucleotide (sc-2505)          | AGTTGAGGGGACTTTCCAGG C                            |
| Stat3 consensus oligonucleotide (sc-2571)         | GATCCTTCTGGGAATTCCTAGATC                          |
| Myc-Max consensus oligonucleotide (sc-2509)       | GGAAGCAGACCACGTGGTCTGCTCC                         |
| AP-1 consensus oligonucleotide (sc-2501)          | CGCTTGATGACTCAGCCGGAA                             |
| ChIP                                              |                                                   |
| rs7132434_ChIP_forward                            | TAACTTGGCCTGTCTGTTGC                              |
| rs7132434_ChIP_reverse                            | AATTGCTCAAGCCTCAGCTC                              |



### Supplementary Reference

1. Rao, S.S. *et al.* A 3D map of the human genome at kilobase resolution reveals principles of chromatin looping. *Cell* **159**, 1665-80 (2014).
